# Supplementary material for: Probabilistic Genotyping of Single Cell Replicates from Mixtures Involving First-Degree Relatives Prevents the False Inclusions of Non-Donor Relatives
Source: MDPI journal article supplement (doi:10.3390/genes13091658), 2022-09-15
Supplement: s1 [file s1]

## Supplementary Tables

**Supplementary Table S1.** Mixture 1: Father/Mother/2 Unrelated individuals, POI vs. unrelated individuals. Log (LR)s obtained from standard bulk analysis with and without conditioning on known donors. False inclusions obtained with very strong/ strong support or false exclusion (red); False inclusions with limited/ moderate support (orange). NOC: N= 4, N-1 = 3.

| vs. unrelated. |                    | POI | Reference | Std Mix | COND F | COND M | COND U1 | COND U2 |
|----------------|--------------------|-----|-----------|---------|--------|--------|---------|---------|
| N              | Donors             | F   | 28        | 23      |        | 27     | 23      | 24      |
|                |                    | M   | 25        | 11      | 15     |        | 11      | 20      |
|                |                    | U1  | 25        | 5       | 6      | 5      |         | 11      |
|                |                    | U2  | 27        | 9       | 10     | 16     | 13      |         |
|                | Related Non-donors | C1  | 27        | 6       | -2     | -13    | 5       | 2       |
|                |                    | C2  | 25        | 2       | -1     | -12    | 0.60    | -8      |
| N-1            | Donors             | F   | 28        | 23      |        | 0      | 0       | 19      |
|                |                    | M   | 25        | 8       | 0      |        | 0       | 0       |
|                |                    | U1  | 25        | 0       | 0      | 0      |         | 0       |
|                |                    | U2  | 27        | -7      | -12    | 0      | 0       |         |
|                | Related Non-donors | C1  | 27        | -5      | 0      | 0      | 0       | 0       |
|                |                    | C2  | 25        | 0       | 0      | 0      | 0       | 2       |

**Supplementary Table S2. Mixture 1: Father/Mother/2 Unrelated individuals, POI vs. relative.** Log (LR)s obtained with and without conditioning on known donors. False exclusions (red); False inclusions with limited/ moderate support (orange). NOC: N= 4, N-1 = 3.

| vs. relative. |                    | POI | LR type       | Reference | Std Mix | COND F | COND M | COND U1 | COND U2 |
|---------------|--------------------|-----|---------------|-----------|---------|--------|--------|---------|---------|
| N             | Donors             | F   | vs. child     | 15        | 12      |        | 15     | 12      | 13      |
|               |                    | M   | vs. child     | 14        | 6       | 8      |        | 6       | 12      |
|               |                    | U1  | vs. unrelated | 25        | 5       | 6      | 5      |         | 11      |
|               |                    | U2  | vs. unrelated | 27        | 9       | 10     | 16     | 13      |         |
|               | Related Non-donors | C1  | vs. parent    | 15        | 0.85    | -5     | -21    | -2      | -5      |
|               |                    | C2  | vs. parent    | 14        | -5      | -3     | -20    | -7      | -15     |
| N-1           | Donors             | F   | vs. child     | 15        | 12      |        | 0      | 0       | 8       |
|               |                    | M   | vs. child     | 14        | 2       | 0      |        | 0       | 0       |
|               |                    | U1  | vs. unrelated | 25        | 0       | 0      | 0      |         | 0       |
|               |                    | U2  | vs. unrelated | 27        | -7      | -12    | 0      | 0       |         |
|               | Related Non-donors | C1  | vs. parent    | 15        | -5      | 0      | 0      | 0       | 0       |
|               |                    | C2  | vs. parent    | 14        | 0       | 0      | 0      | 0       | 2       |

**Supplementary Table S3. Mixture 2: Father/Mother/Child/1 Unrelated individual, POI vs. unrelated individuals.** Log (LR)s obtained with and without conditioning on known donors. False exclusions (red); inclusion of true donor but with only limited/ moderate support (orange). NOC: N=4, N-1 = 3.

| vs. unrelated | POI | Reference | Std Mix | COND F | COND M | COND C1 | COND U |
|---------------|-----|-----------|---------|--------|--------|---------|--------|
| N             | F   | 27        | 11      |        | 15     | 2       | 13     |
|               | M   | 25        | -4      | -5     |        | -4      | -4     |
|               | C1  | 26        | 14      | 7      | 6      |         | 19     |
|               | U   | 26        | 9       | 12     | 11     | 14      |        |
|               | C2  | 26        | -5      | -5     | -2     | -4      | -4     |
|               | C3  | 25        | -4      | -5     | -3     | -4      | -5     |
| N-1           | F   | 27        | 11      |        | 15     | 0       | 13     |
|               | M   | 25        | 0       | 9      |        | 0       | 0      |
|               | C1  | 26        | 14      | 0      | 0      |         | 19     |
|               | U   | 26        | 10      | 12     | 11     | 14      |        |
|               | C2  | 26        | 0       | 0      | 0      | 0       | 0      |
|               | C3  | 25        | 0       | 0      | 0      | 0       | 0      |

**Supplementary Table S4. Mixture 2: Father/Mother/Child/1 Unrelated individual, with Mx priors function.** Log (LR)s vs. unrelated obtained using Mx priors function with and without conditioning on known donors. False inclusion with very strong/ strong support or false exclusion (red); False inclusion with limited/ moderate support or inclusion of true donor with only limited/ moderate support (orange). NOC: N=4.

| (Mx priors) vs. unrelated | POI | Reference | Std Mix | COND F | COND M | COND C1 | COND U |
|---------------------------|-----|-----------|---------|--------|--------|---------|--------|
| N                         | F   | 27        | 10      |        | 12     | 9       | 12     |
|                           | M   | 25        | 6       | 9      |        | 3       | 7      |
|                           | C1  | 26        | 11      | 11     | 9      |         | 14     |
|                           | U   | 26        | 8       | 11     | 10     | 11      |        |
|                           | C2  | 26        | 6       | 2      | 4      | 4       | 8      |
|                           | C3  | 25        | 6       | 3      | 3      | 3       | 7      |

**Supplementary Table S5. Mixture 2: Father/Mother/Child/1 Unrelated individual, unified LR<sub>s</sub>.** Log (LR)<sub>s</sub> (unified) obtained with and without conditioning on known donors. False exclusion (red); inclusion of true donor with only limited/ moderate support (orange). NOC: N= 4, N-1 = 3.

| UNIFIED | POI | Reference | Std Mix | COND F | COND M | COND C1 | COND U |
|---------|-----|-----------|---------|--------|--------|---------|--------|
| N       | F   | 17        | 10      |        | 13     | 1       | 12     |
|         | M   | 16        | -5      | -6     |        | -5      | -5     |
|         | C1  | 16        | 13      | 6      | 5      |         | 15     |
|         | U   | 16        | 9       | 12     | 11     | 13      |        |
|         | C2  | 16        | -5      | -6     | -3     | -5      | -5     |
|         | C3  | 16        | -5      | -6     | -4     | -5      | -5     |
| N-1     | F   | 17        | 10      |        | 13     | 0       | 12     |
|         | M   | 16        | 0       | 5      |        | 0       | 0      |
|         | C1  | 16        | 13      | 0      | 0      |         | 15     |
|         | U   | 16        | 9       | 12     | 10     | 13      |        |
|         | C2  | 16        | 0       | 0      | 0      | 0       | 0      |
|         | C3  | 16        | 0       | 0      | 0      | 0       | 0      |

**Supplementary Table S6. Mixture 2: Father/Mother/Child/1 Unrelated individual, unified LR<sub>s</sub> (with Mx priors function).** LR<sub>s</sub> (unified) obtained using Mx priors function with and without conditioning on known donors. False inclusion with very strong/ strong support; False inclusion with limited/ moderate support or inclusion of true donor with only limited/ moderate support (orange). NOC: N= 4.

| UNIFIED | POI | Reference | Std Mix | COND F | COND M | COND C1 | COND U |
|---------|-----|-----------|---------|--------|--------|---------|--------|
| N       | F   | 17        | 9       |        | 12     | 9       | 12     |
|         | M   | 16        | 5       | 8      |        | 2       | 7      |
|         | C1  | 16        | 11      | 10     | 9      |         | 13     |
|         | U   | 16        | 8       | 10     | 9      | 10      |        |
|         | C2  | 16        | 5       | 1      | 4      | 4       | 7      |
|         | C3  | 16        | 5       | 3      | 3      | 2       | 7      |

**Supplementary Table S7. Mixture 3: Sibling 1/ Sibling 2/ Sibling 3/ Sibling 4, POI vs. unrelated individuals.** Log (LR)s obtained with and without conditioning on known donors. False inclusion with very strong/ strong support or false exclusion (red); False inclusion with limited/ moderate support or inclusion of true donor with only limited/ moderate support (orange).

| vs. unrelated |                   | POI | Reference | Std Mix | COND S1 | COND S2 | COND S3 | COND S4 |
|---------------|-------------------|-----|-----------|---------|---------|---------|---------|---------|
| N             | Known Donors      | S1  | 23        | 10      |         | 5       | 4       | 9       |
|               |                   | S2  | 24        | 13      | 9       |         | 10      | 16      |
|               |                   | S3  | 25        | 12      | 6       | 8       |         | 4       |
|               |                   | S4  | 24        | 12      | 11      | 14      | 5       |         |
|               | Related Non-donor | S5  | 23        | 8       | 3       | 3       | 4       | 2       |
| N-1           | Known Donors      | S1  | 23        | 11      |         | 4       | 2       | 9       |
|               |                   | S2  | 24        | 14      | 8       |         | 9       | 16      |
|               |                   | S3  | 25        | 12      | 6       | 7       |         | 4       |
|               |                   | S4  | 24        | 12      | 11      | 14      | 3       |         |
|               | Related Non-donor | S5  | 23        | 9       | 3       | 2       | 3       | 2       |
| N-2           | Known Donors      | S1  | 23        | 11      |         | 0       | 0       | 0       |
|               |                   | S2  | 24        | 14      | 0       |         | 0       | 0       |
|               |                   | S3  | 25        | 13      | 0       | 0       |         | 0       |
|               |                   | S4  | 24        | 13      | 0       | 0       | 0       |         |
|               | Related Non-donor | S5  | 23        | 9       | 0       | 0       | 0       | 0       |

**Supplementary Table S8. 4 Siblings. Mixture 3: Sibling 1/ Sibling 2/ Sibling 3/ Sibling 4, unified LR.s.** Log (LR)s (unified) obtained with and without conditioning on known donors. False inclusion with very strong/ strong support or false exclusion (red); False inclusion with limited/ moderate support or inclusion of true donor with only limited/ moderate support (orange).

| UNIFIED |                   | POI | Reference | Std Mix | Cond. S1 | Cond. S2 | Cond. S3 | Cond. S4 |
|---------|-------------------|-----|-----------|---------|----------|----------|----------|----------|
| N       | Known Donors      | S1  | 16        | 10      |          | 4        | 4        | 8        |
|         |                   | S2  | 16        | 13      | 8        |          | 10       | 14       |
|         |                   | S3  | 16        | 11      | 6        | 7        |          | 4        |
|         |                   | S4  | 16        | 11      | 10       | 13       | 4        |          |
|         | Related Non-donor | S5  | 16        | 8       | 3        | 3        | 4        | 2        |
| N-1     | Known Donors      | S1  | 16        | 10      |          | 3        | 2        | 8        |
|         |                   | S2  | 16        | 13      | 8        |          | 9        | 13       |
|         |                   | S3  | 16        | 12      | 6        | 7        |          | 3        |
|         |                   | S4  | 16        | 12      | 10       | 13       | 2        |          |
|         | Related Non-donor | S5  | 16        | 8       | 3        | 2        | 2        | 2        |
| N-2     | Known Donors      | S1  | 16        | 10      |          | 0        | 0        | 0        |
|         |                   | S2  | 16        | 13      | 0        |          | 0        | 0        |
|         |                   | S3  | 16        | 12      | 0        | 0        |          | 0        |
|         |                   | S4  | 16        | 12      | 0        | 0        | 0        |          |
|         | Related Non-donor | S5  | 16        | 9       | 0        | 0        | 0        | 0        |
